# Supplementary material
Source: PubMed Central journal article supplement (PMC5535022)
Supplement: 10.1074_M116.763565_jbc.M116.763565-1.pdf [file 10.1074_M116.763565_jbc.M116.763565-1.pdf]

# **Allosteric Modulation of Human Dopamine Transporter Activity under Conditions Promoting its Dimerization**

**Mary Hongying Cheng,<sup>1+</sup> Jennie Garcia-Olivares,<sup>2+</sup> Steven Wasserman<sup>2</sup>, Jennifer DiPietro<sup>2</sup>, and Ivet Bahar<sup>1\*</sup>**

From <sup>1</sup>the Department of Computational and Systems Biology, School of Medicine, University of Pittsburgh, Pittsburgh, PA 15260; and <sup>2</sup>Laboratory of Molecular and Cellular Neurobiology, National Institute of Mental Health, NIH, Bethesda, MD 20892.

Running title: *Human dopamine transporter dimerization*

\*To whom correspondence should be addressed: Ivet Bahar, Department of Computational and Systems Biology, School of Medicine, University of Pittsburgh, 3064 BST 3, 3501 Fifth Avenue, Pittsburgh, PA 15213. Phone: 412 648 3332; Fax: 412 648 3163; e-mail: bahar@pitt.edu

## Supplementary Figures

Computed & X-ray structure for OFo LeuT dimer

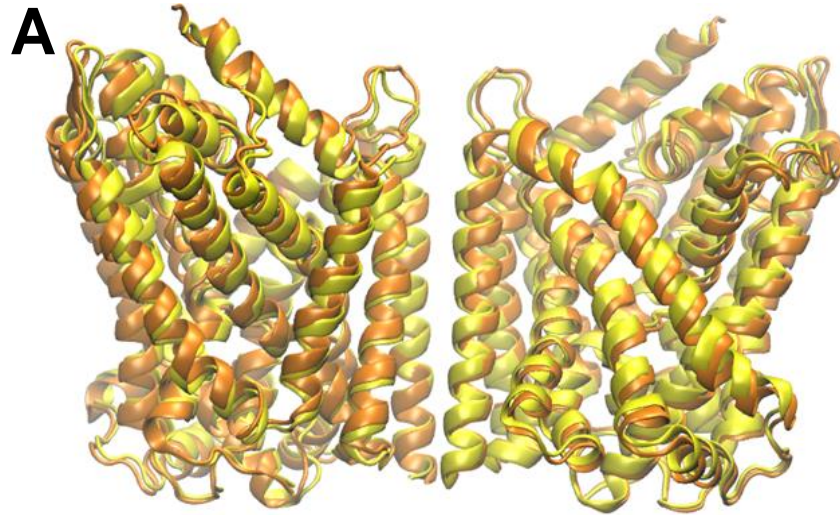

Computed models for OFo & IFo LeuT dimers

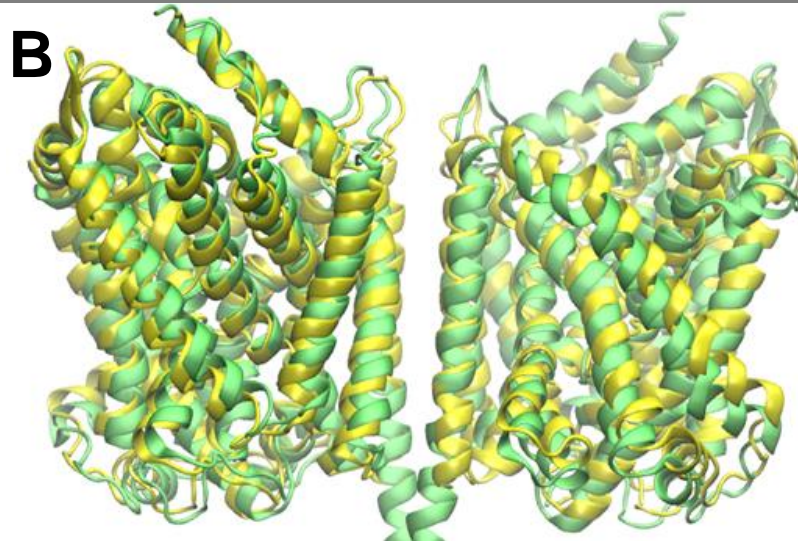

**Figure S1:** The computed LeuT dimer in different conformation states. **(A)** Comparison of the computed OFo LeuT dimer structure (*yellow*) with that structurally resolved (*orange*) (PDB: 3TT1). **(B)** Alignment of the computed OFo LeuT dimer (*yellow*) with the computed IFo LeuT dimer (*green*).

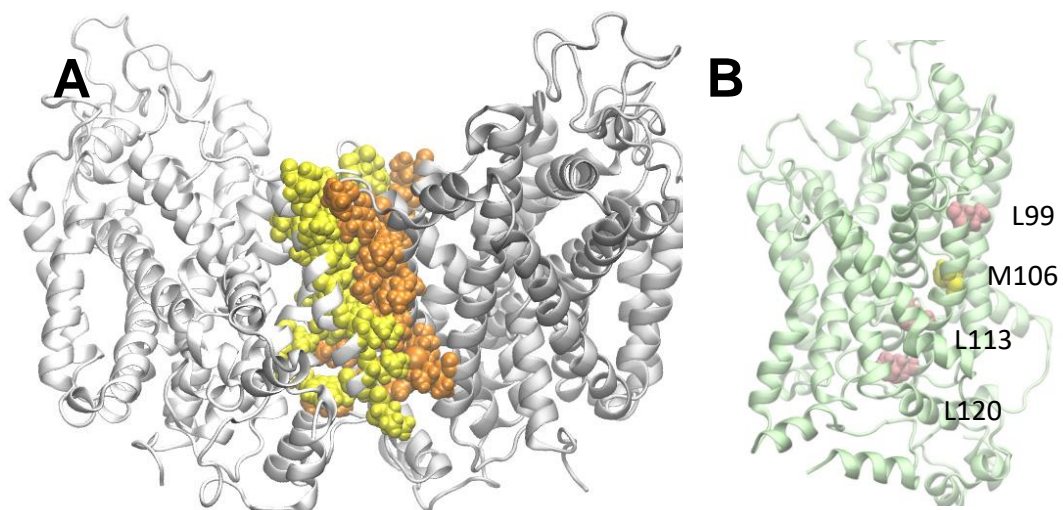

**Figure S2: Large hydrophobic patch at the interface of the two subunits in the hDAT dimer.** (A) Hydrophobic interfacial contact colored differently (*yellow* and *orange* represent hydrophobic residues from different subunits); (B) The predicted Leucine zipper (L99, M106, L113 and L120) (1) is not in direct contact. Instead one residue shift: V100, V107 and P112 contribute to direct interfacial interactions.
